# Supplementary material for: Bat3 deficiency accelerates the degradation of Hsp70-2/HspA2 during spermatogenesis
Source: PubMed Central journal article supplement — J Cell Biol. 2008 Aug 11;182(3):449–58. doi: 10.1083/jcb.200802113 (PMC2500131; doi:10.1083/jcb.200802113), 2008-08-11
Supplement: jcb.200802113_4.pdf [file jcb.200802113_4.pdf]

Table S1. **Bat3 deficiency does not affect hormone levels**

| <b>Hormone/genotype</b> | <b>+/+ (n = 4)</b> | <b>-/- (n = 4)</b> |
|-------------------------|--------------------|--------------------|
| Testosterone (pg/ml)    | 1,838.1 ± 74       | 1,834.0 ± 51       |
| LH (ng/ml)              | 0.22 ± 0.10        | 0.20 ± 0.04        |
| FSH (ng/ml)             | 31.25 ± 7.8        | 33.56 ± 4.1        |

Data represent mean ± SEM.

Table S2. **List of RT-PCR primers**

| <b>Gene</b>    | <b>Forward (5'-3')</b> | <b>Reverse (5'-3')</b>  |
|----------------|------------------------|-------------------------|
| <i>Dazl</i>    | CCTCCAACCATGATGAATCC   | TCTGTATGCTTCGGTCCACA    |
| <i>Plzf</i>    | TGAGATCCTCTCCACCGAA    | GTAGGACTCATGGCTGAGAGA   |
| <i>Dmc1</i>    | GGAGGATCAAGTTGTGCAGGA  | ATTCCTGGCTCCCAGTAGTA    |
| <i>Pgk2</i>    | CTGTTGCTGATGAGCTCAAG   | ACTCCGACCATAGAAGTGTG    |
| <i>Prm1</i>    | ATGCTGCCGCAGCAAAAGCA   | CACCTTATGGTGTATGAGCG    |
| <i>Gata-1</i>  | CAGGTTTCTTTTCTCTGGG    | AAAGGACTGGGAAAGTCAGC    |
| <i>Bat3</i>    | CCCATGGAGTCAGAAGAAATGG | GGAGTCGTGTAGTGAGACATAGG |
| <i>Hsp70-2</i> | CTACGTGGCCTTCACTGACA   | GGTCAGGATGGACACATCGA    |
| <i>Gapdh</i>   | ATTGTCAGCAATGCATCCTG   | TTCAGCTCTGGGATGACCTTGCC |
